# Supplementary material for: Brain-Derived Neurotrophic Factor (BDNF) Regulates Rab5-Positive Early Endosomes in Hippocampal Neurons to Induce Dendritic Branching
Source: PubMed Central journal article supplement (PMC6304382; doi:10.3389/fncel.2018.00493), 2018-12-17
Supplement: Data_Sheet_1.pdf [file Data_Sheet_1.pdf]

## Supplementary Figures

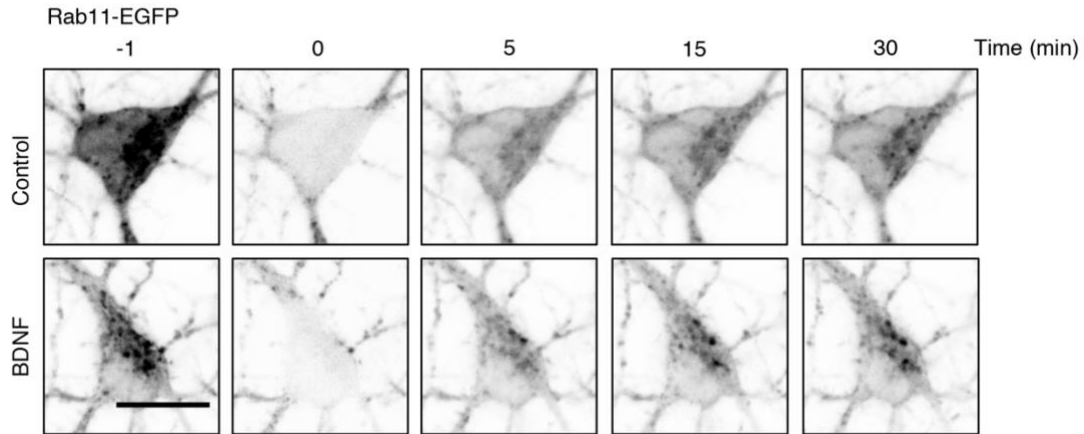

**Supplementary Figure 1. FRAP in the cell body of EGFP-Rab11.** FRAP was performed in cell bodies of hippocampal neurons (time 0), and recovery was evaluated after 5, 15 and 30 min. Representative individual frames of a recording performed in a neuron expressing EGFP-Rab11. Recording was performed in control conditions or after BDNF treatment. The panel shows EGFP-Rab11 endosomes in the cell body before FRAP (-1 min), just after FRAP (0 min) and after 5, 15, 30 min of FRAP.

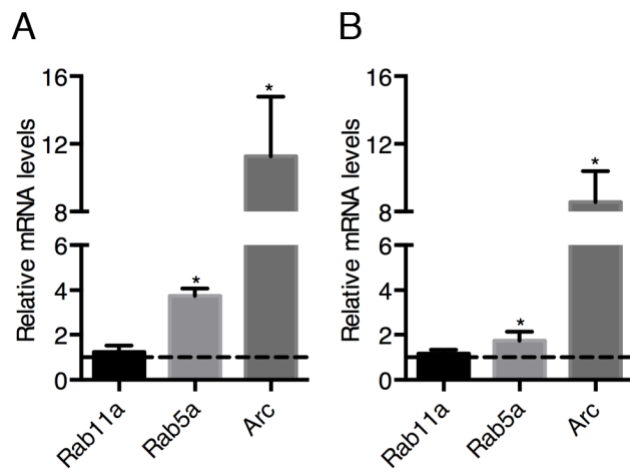

**Supplementary Figure 2. BDNF stimulation increases rab5a but not rab11a mRNA levels.** A total of 8-9 DIV hippocampal neurons were stimulated with BDNF (50 ng/mL) for 4 h (A) or 12 h (B). mRNA levels of rab5a, rab11a and arc were analyzed by qPCR. Expression levels were normalized by  $\beta$ -actin, Tbp and Pgk-1 mRNA levels. Arc mRNA levels were evaluated as a positive control of BDNF stimulation. Quantification was done of relative levels of mRNA with  $2^{-\Delta\Delta C_t}$ , showed as a fold changes of nonstimulated neurons (black dashed line). The results are expressed as the mean  $\pm$  SEM, from 3 independent experiments. \* $<0.5$ ; by Student's T-test.
